# Supplementary material for: Late Endosomal/Lysosomal Cholesterol Accumulation Is a Host Cell-Protective Mechanism Inhibiting Endosomal Escape of Influenza A Virus
Source: PubMed Central journal article supplement (PMC6058292; doi:10.1128/mbio.01345-18), 2018-07-24

A  
A549-WT

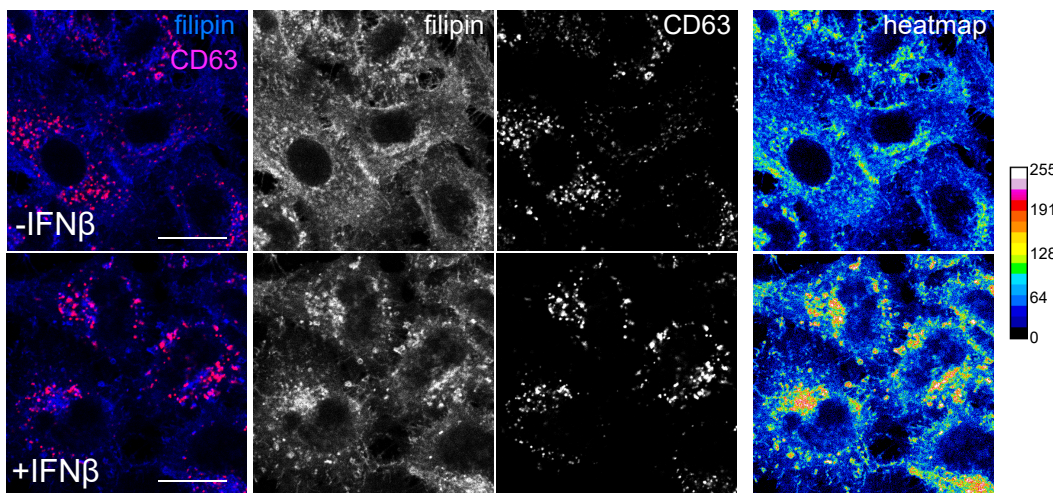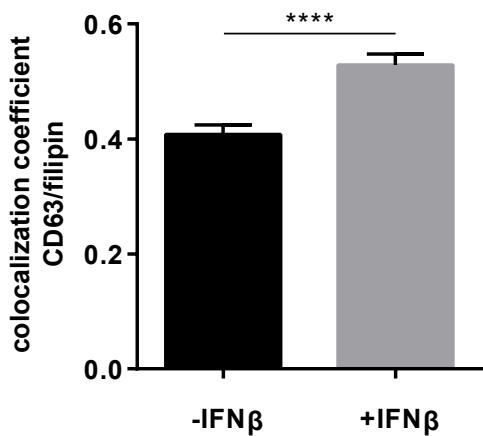

B  
A549-WT

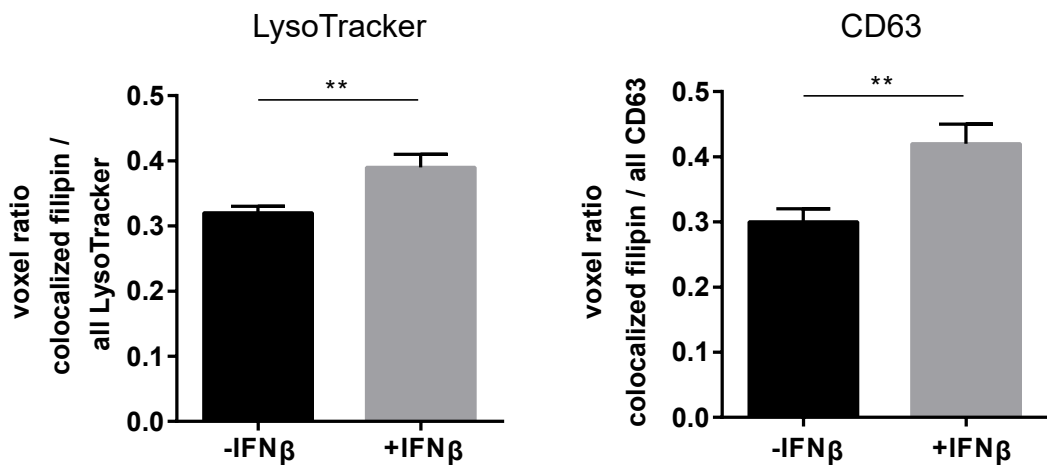

Supplement: mbo004183990sf1.pdf [file mbo004183990sf1.pdf]
