# Supplementary material for: Late Endosomal/Lysosomal Cholesterol Accumulation Is a Host Cell-Protective Mechanism Inhibiting Endosomal Escape of Influenza A Virus
Source: PubMed Central journal article supplement (PMC6058292; doi:10.1128/mbio.01345-18), 2018-07-24

A

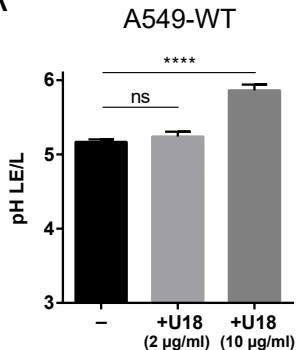

B

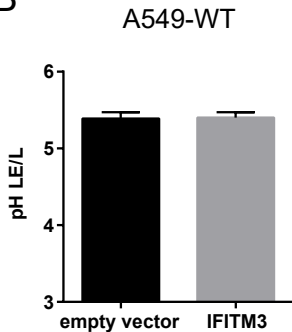

C

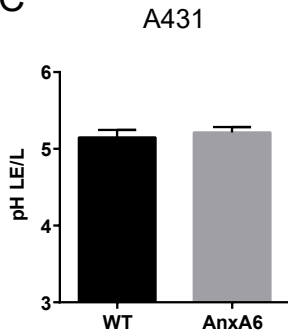

Supplement: mbo004183990sf3.pdf [file mbo004183990sf3.pdf]
